# Supplementary material for: Phase state and viscosity of secondary organic aerosols over China simulated by WRF-Chem
Source: Copernicus journal article supplement (doi:10.5194/egusphere-2023-1444), 2023-08-14
Supplement: Supplementary file 1 [file egusphere-2023-1444-supplement.pdf]

*Supplement of*

## **Phase state and viscosity of secondary organic aerosols over China simulated by WRF-Chem**

Zhiqiang Zhang<sup>1,2</sup>, Ying Li<sup>1</sup>, Haiyan Ran<sup>1,2</sup>, Junling An<sup>1</sup>, Yu Qu<sup>1</sup>, Wei Zhou<sup>1</sup>, Weiqi Xu<sup>1</sup>, Weiwei Hu<sup>3</sup>, Hongbin Xie<sup>4</sup>, Zifa Wang<sup>1</sup>, Yele Sun<sup>1</sup>, Manabu Shiraiwa<sup>5</sup>

<sup>1</sup>State Key Laboratory of Atmospheric Boundary Layer Physics and Atmospheric Chemistry, Institute of Atmospheric Physics, Chinese Academy of Sciences, Beijing 100029, China

<sup>2</sup>College of Earth and Planetary Sciences, University of Chinese Academy of Sciences, Beijing 100049, China

<sup>3</sup>State Key Laboratory of Organic Geochemistry, Guangzhou Institute of Geochemistry, Chinese Academy of Sciences, Guangzhou 510640, China

<sup>4</sup>Key Laboratory of Industrial Ecology and Environmental Engineering (Ministry of Education), School of Environmental Science and Technology, Dalian University of Technology, Dalian 116024, China

<sup>5</sup>Department of Chemistry, University of California, Irvine, Irvine, CA 92697-2025, USA

*Correspondence to:* Ying Li (liying-iap@mail.iap.ac.cn)

## S1. Bulk diffusion coefficient of organic and water molecules within SOA particles.

The diffusion coefficient in the bulk ( $D_b$ ) is an important parameter determining the mass-transport and mixing rates. We calculate the  $D_b$  of organic molecules within SOA particles by the fractional Stokes–Einstein equation (Price et al., 2016; Evoy et al., 2019):

$$D_{b,org} = D_c \left( \frac{\eta_c}{\eta} \right)^\xi \quad (1)$$

where  $\eta$  is the viscosity of SOA particles. The fit parameter  $\xi$  is 0.93 (Evoy et al., 2019).  $\eta_c$  is the crossover viscosity at which the Stokes–Einstein equation and the fractional Stokes–Einstein equation predict the same diffusion coefficient. The value of  $\eta_c$  is  $10^{-3}$  Pa s (Evoy et al., 2019).  $D_c$  is the crossover diffusion coefficient:

$$D_c = \frac{kT}{6\pi R_{diff} \eta_c} \quad (2)$$

where  $k$  is Boltzmann constant ( $1.38 \times 10^{-23}$  J K<sup>-1</sup>),  $T$  is the temperature (K), and  $R_{diff}$  is the hydrodynamic radius of the diffusing species, with a value of  $4 \times 10^{-10}$  m for organic molecules (Maclean et al., 2021).

The fractional Stokes–Einstein equation is also used to determine the diffusion coefficient of water (Price et al., 2016; Evoy et al., 2019; Evoy et al., 2020):

$$D_{b,H_2O}(RH, T) = D_0(T) \left( \frac{\eta_0(T)}{\eta(RH, T)} \right)^\delta \quad (3)$$

where  $D_0(T)$  is the temperature-dependent diffusion coefficient of water molecules in pure water, which can be calculated using the Stokes–Einstein equation (Price et al., 2016).  $\eta_0(T)$  is the temperature-dependent viscosity of pure water, obtained from the VTF equation in Maclean et al. (2021):  $\log(\eta_0(T)) = A + \frac{B}{T-T_0}$ . The values of  $A$ ,  $B$ , and  $T_0$  are  $-4.28$ ,  $152.87$  and  $173.06$ , respectively, obtained from fitting the temperature-dependent viscosities of water (Hallett, 1963; Crittenden et al., 2012) to the VTF equation.  $\delta$  is the fractional exponent and can be calculated by Eq. 4:

$$\delta = 1 - \left[ A_1 \exp \left( -B_1 \frac{R_{diff}}{R_{matrix}} \right) \right] \quad (4)$$

where  $A_1$  and  $B_1$  are coefficients with values of  $0.73$  and  $1.79$ , respectively (Evoy et al., 2020). The radius ( $R_{diff}$ ) of the diffusing molecule, i.e., the water molecule, is  $10^{-10}$  m. The radius of the matrix molecules ( $R_{matrix}$ ) is assumed to be  $4 \times 10^{-10}$  m, representing the size of organic molecules (Maclean et al., 2021).

## S2. Definitions of model performance statistics.

The mean bias (MB), normalized mean bias (NMB), root mean squared error (RMSE) and index of agreement (IOA) are calculated based on the equations below.  $P_i$  represents the simulated data, and  $O_i$  represents observed data.  $N$  is the number of the data pairs.  $\bar{O}$  is the mean value of the observed data:

$$MB = \frac{\sum_{i=1}^N (P_i - O_i)}{N}$$

$$NMB = \frac{\sum_{i=1}^N (P_i - O_i)}{\sum_{i=1}^N O_i} \times 100\%$$

$$RMSE = \sqrt{\frac{\sum_{i=1}^N (P_i - O_i)^2}{(N - 1)}}$$

$$IOA = 1 - \frac{\sum_{i=1}^N (O_i - P_i)^2}{\sum_{i=1}^N (|P_i - \bar{O}| + |O_i - \bar{O}|)^2}$$

**Table S1.** Physical and chemical options in WRF-Chem used in this study.

| Physical/chemical schemes | Options                                          |
|---------------------------|--------------------------------------------------|
| Advection scheme          | Runge-Kutta 3rd order                            |
| Cloud microphysics        | Lin et al. 1983 (Lin et al., 1983)               |
| Long-wave radiation       | RRTM                                             |
| Short-wave radiation      | Goddard                                          |
| Surface layer             | Revised MM5 Monin-Obukhov scheme                 |
| Land-surface model        | Unified Noah land-surface model                  |
| Boundary layer scheme     | YSU                                              |
| Cumulus parameterization  | Grell 3D                                         |
| Photolysis scheme         | Madronich F-TUV photolysis                       |
| Chemistry option          | Updated MOZART-4 mechanism (Emmons et al., 2010) |
| Aerosol option            | MOSAIC (Zaveri et al., 2008)                     |

**Table S2.** Model performance statistics for simulated hourly mean RH,  $T$ , concentrations of  $PM_{2.5}$  and  $PM_{2.5}$  components at the IAP site.

|             | Mean (observed)            | Mean (simulated)           | MB                         | NMB      | RMSE                       | IOA  |
|-------------|----------------------------|----------------------------|----------------------------|----------|----------------------------|------|
| RH          | 40.60 %                    | 29.63 %                    | -10.97 %                   | -27.01 % | 14.90 %                    | 0.87 |
| $T$         | 299.48 K                   | 301.29 K                   | 1.81 K                     | 0.60 %   | 2.84 K                     | 0.93 |
| $PM_{2.5}$  | 52.05 $\mu\text{g m}^{-3}$ | 46.32 $\mu\text{g m}^{-3}$ | -3.88 $\mu\text{g m}^{-3}$ | -7.45 %  | 36.40 $\mu\text{g m}^{-3}$ | 0.64 |
| $NH_4^+$    | 5.68 $\mu\text{g m}^{-3}$  | 3.71 $\mu\text{g m}^{-3}$  | -1.90 $\mu\text{g m}^{-3}$ | -33.43 % | 5.33 $\mu\text{g m}^{-3}$  | 0.69 |
| $NO_3^-$    | 8.71 $\mu\text{g m}^{-3}$  | 4.27 $\mu\text{g m}^{-3}$  | -4.43 $\mu\text{g m}^{-3}$ | -50.86 % | 11.05 $\mu\text{g m}^{-3}$ | 0.70 |
| $SO_4^{2-}$ | 8.73 $\mu\text{g m}^{-3}$  | 6.56 $\mu\text{g m}^{-3}$  | -1.98 $\mu\text{g m}^{-3}$ | -22.70 % | 7.01 $\mu\text{g m}^{-3}$  | 0.70 |
| SOA         | 11.03 $\mu\text{g m}^{-3}$ | 5.15 $\mu\text{g m}^{-3}$  | -5.88 $\mu\text{g m}^{-3}$ | -53.28 % | 8.18 $\mu\text{g m}^{-3}$  | 0.49 |

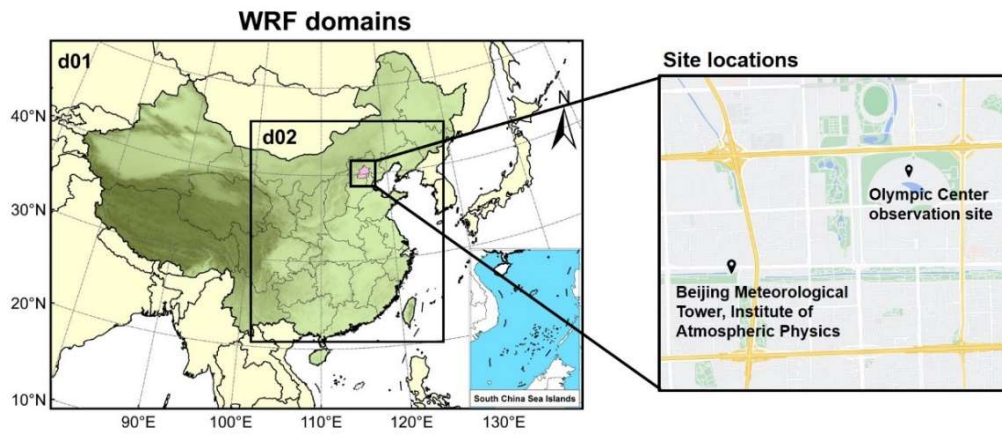

**Figure S1.** The WRF-Chem model domains and the observation sites. The map of the observation sites is adopted from © Google Maps.

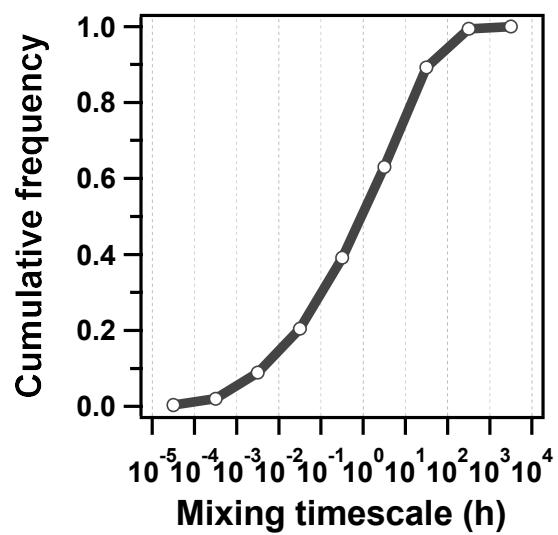

**Figure S2.** Cumulative distributions of mixing timescales of organic molecules within 200 nm SOA matrix at the IAP site.

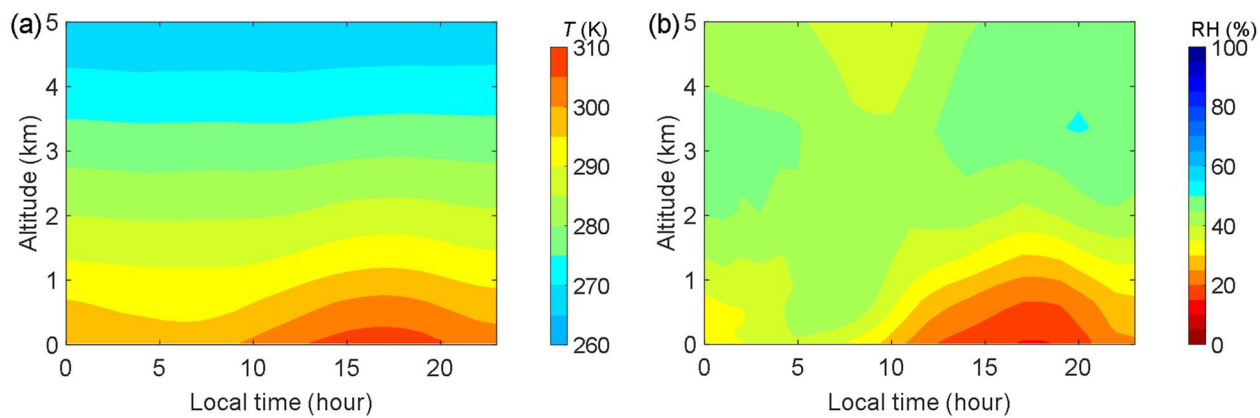

**Figure S3.** Median diurnal and vertical profiles of WRF-Chem predicted (a) temperature, and (b) relative humidity at the IAP site during May 20 – June 23 in 2018. Note: altitude is approximate and estimated from WRF-Chem pressure layers.

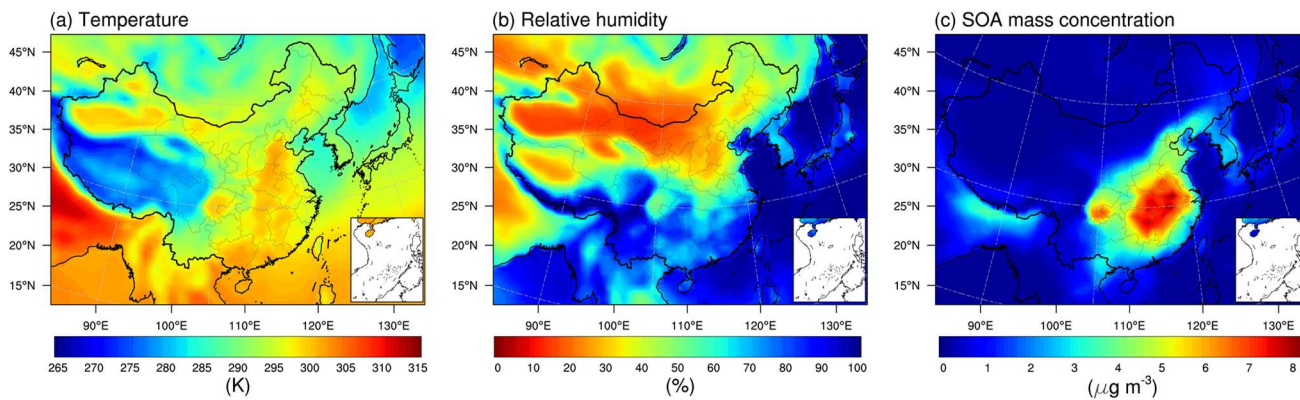

**Figure S4.** WRF-Chem predicted median surface values of (a)  $T$ , (b) RH, and (c) total SOA mass concentrations formed from VOC.



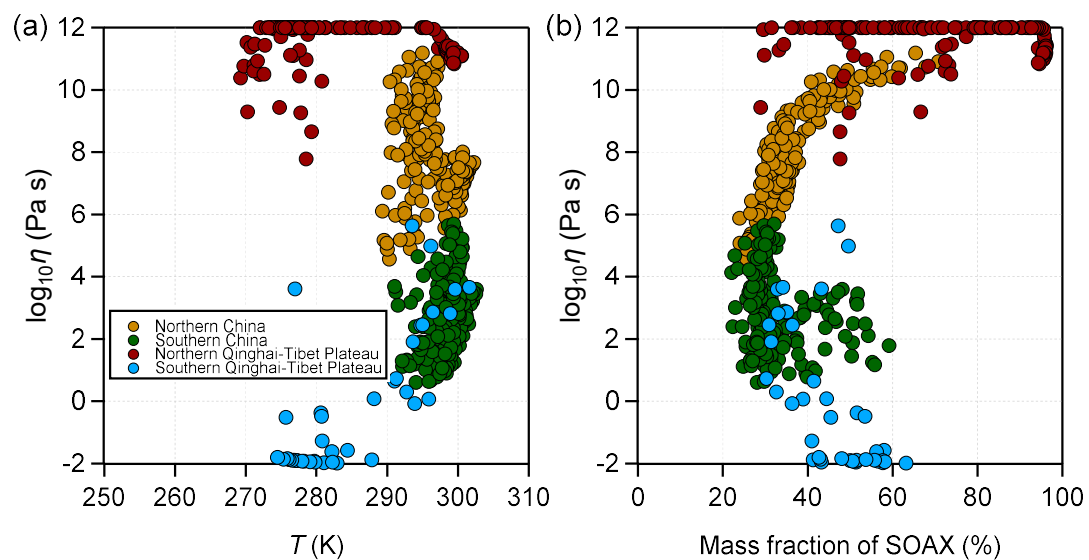

**Figure S5.** The median values of viscosity as a function of (a)  $T$  and (b) the mass fraction of SOAX ( $C^* = 0.1 \mu\text{g m}^{-3}$  at 298 K) calculated for selected regions in the northern China, southern China, northern Qinghai-Tibet Plateau, and southern Qinghai-Tibet Plateau as specified by white boxes in panel (a) during May 20 – June 23 in 2018.

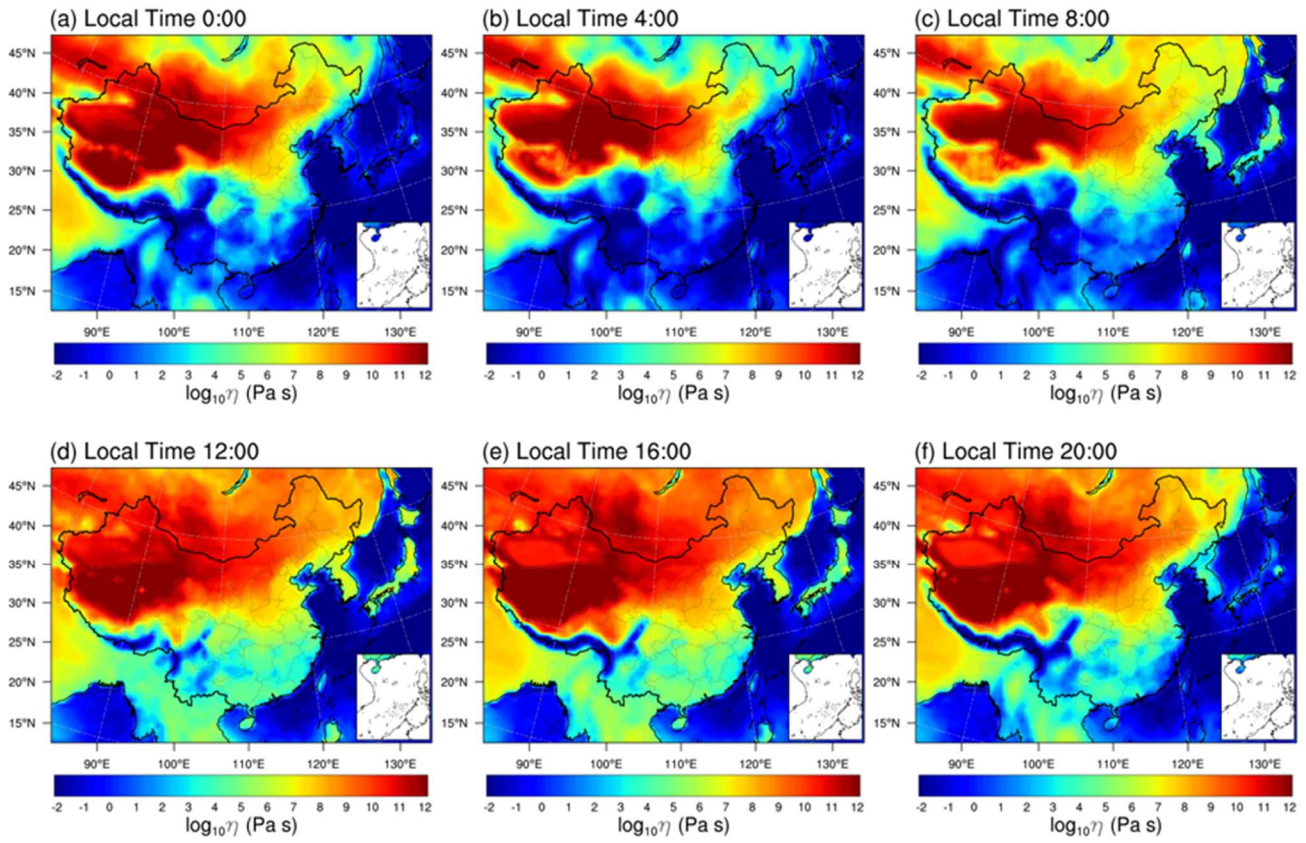

**Figure S6.** WRF-Chem predicted median surface values of viscosity at local time (hours in Beijing) during May 20 – June 23 in 2018.

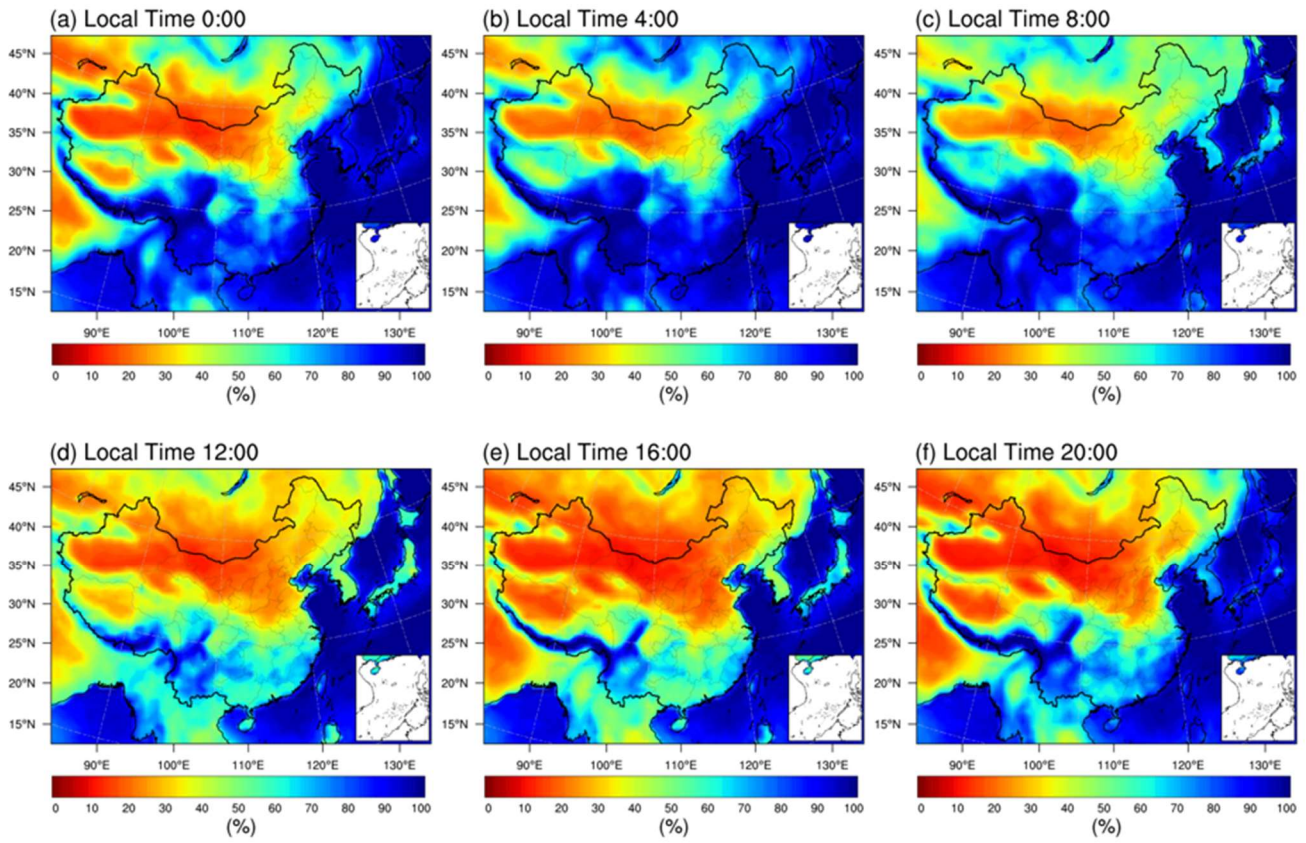

**Figure S7.** WRF-Chem predicted median surface values of RH at local time (hours in Beijing) during May 20 – June 23 in 2018.

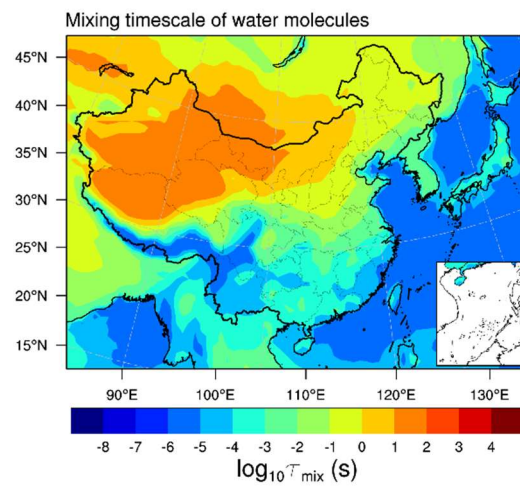

**Figure S8.** WRF-Chem predicted median surface values of mixing timescales of water molecules in a 200 nm particle during May 20 – June 23 in 2018.

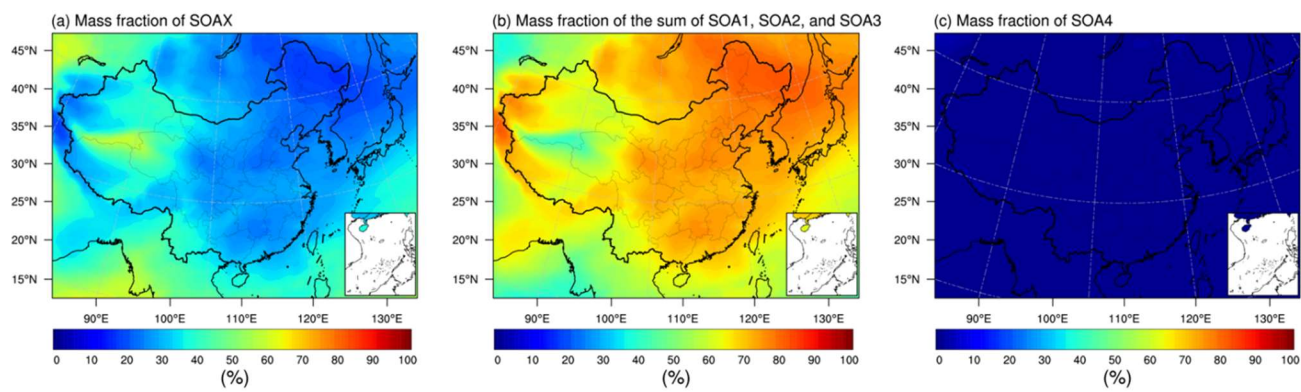

**Figure S9.** The predicted median values of mass fraction of (a) SOAX, (b) sum of SOA1, SOA2, and SOA3, and (c) SOA4 at 500 hPa during May 20 – June 23 in 2018 simulated in the base case (Table 1). SOAX, SOA1, SOA2, SOA3, and SOA4 represent the SOA with  $C^*$  of 0.1, 1, 10, 100, and 1000  $\mu\text{g m}^{-3}$  at 298 K, respectively.

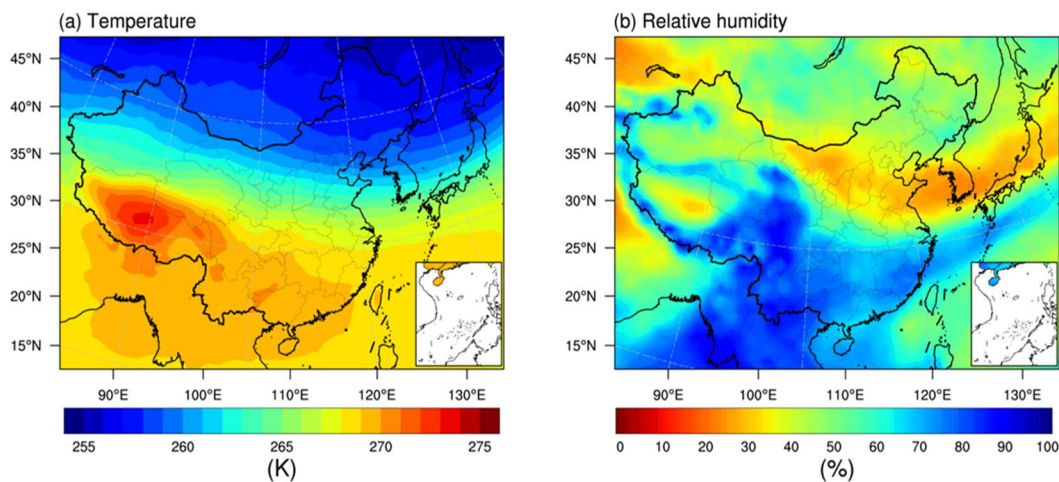

**Figure S10.** The predicted median values of (a)  $T$  and (b) RH at 500 hPa during May 20 – June 23 in 2018 simulated in the base case (Table 1).

## References

- Crittenden, J. C., Trussel, R. R., Hand, D. W., Howe, K. J., and Tchobanoglous, G.: MWH's Water Treatment, 2012.
- Emmons, L. K., Walters, S., Hess, P. G., Lamarque, J. F., Pfister, G. G., Fillmore, D., Granier, C., Guenther, A., Kinnison, D., Laepple, T., Orlando, J., Tie, X., Tyndall, G., Wiedinmyer, C., Baughcum, S. L., and Kloster, S.: Description and evaluation of the model for ozone and related chemical tracers, version 4 (MOZART-4), *Geosci. Model Dev.*, 3, 43-67, <https://doi.org/10.5194/gmd-3-43-2010>, 2010.
- Evoy, E., Kamal, S., Patey, G. N., Martin, S. T., and Bertram, A. K.: Unified description of diffusion coefficients from small to large molecules in organic–water mixtures, *J. Phys. Chem. A*, 124, 2301-2308, <https://doi.org/10.1021/acs.jpca.9b11271>, 2020.
- Evoy, E., Maclean, A. M., Rovelli, G., Li, Y., Tsimpidi, A. P., Karydis, V. A., Kamal, S., Lelieveld, J., Shiraiwa, M., Reid, J. P., and Bertram, A. K.: Predictions of diffusion rates of large organic molecules in secondary organic aerosols using the Stokes–Einstein and fractional Stokes–Einstein relations, *Atmos. Chem. Phys.*, 19, 10073-10085, <https://doi.org/10.5194/acp-19-10073-2019>, 2019.
- Hallett, J.: The temperature dependence of the viscosity of supercooled water, *Proc. Phys. Soc.*, 82, 1046-1050, <https://doi.org/10.1088/0370-1328/82/6/326>, 1963.
- Lin, Y.-L., Farley, R. D., and Orville, H. D.: Bulk parameterization of the snow field in a cloud model, *J. Appl. Meteorol. Clim.*, 22, 1065-1092, [https://doi.org/10.1175/1520-0450\(1983\)022%3C1065:BPOTSF%3E2.0.CO;2](https://doi.org/10.1175/1520-0450(1983)022%3C1065:BPOTSF%3E2.0.CO;2), 1983.
- Maclean, A. M., Li, Y., Crescenzo, G. V., Smith, N. R., Karydis, V. A., Tsimpidi, A. P., Butenhoff, C. L., Faiola, C. L., Lelieveld, J., Nizkorodov, S. A., Shiraiwa, M., and Bertram, A. K.: Global distribution of the phase state and mixing times within secondary organic aerosol particles in the troposphere based on room-temperature viscosity measurements, *ACS Earth Space Chem.*, 5, 3458-3473, <https://doi.org/10.1021/acsearthspacechem.1c00296>, 2021.
- Price, H. C., Mattsson, J., and Murray, B. J.: Sucrose diffusion in aqueous solution, *Phys. Chem. Chem. Phys.*, 18, 19207-19216, <https://doi.org/10.1039/C6CP03238A>, 2016.
- Zaveri, R. A., Easter, R. C., Fast, J. D., and Peters, L. K.: Model for Simulating Aerosol Interactions and Chemistry (MOSAIC), *J. Geophys. Res.: Atmos.*, 113, <https://doi.org/10.1029/2007JD008782>, 2008.
